# Supplementary material for: Integrative Metabolic and Transcriptomic Profiling in Camellia oleifera and Camellia meiocarpa Uncover Potential Mechanisms That Govern Triacylglycerol Degradation during Seed Desiccation
Source: MDPI journal article supplement (doi:10.3390/plants12142591), 2023-07-08
Supplement: s1 [file s1]

**Supplementary Table S1.** Fatty acid content changes during seed desiccation in *C. meiocarpa* var *Qingguo*, *C. meiocarpa* var *Hongguo*, and *C. oleifera* cv *Min 43*.

| Germplasm | Weeks after anthesis | 16:0        | 16:1 <sup>Δ11</sup> | 18:0        | 18:1 <sup>Δ9</sup> | 18:1 <sup>Δ11</sup> | 18:2 <sup>Δ9,12</sup> | 18:2 <sup>Δ9,12,15</sup> | 20:0        | 20:1 <sup>Δ13</sup> |
|-----------|----------------------|-------------|---------------------|-------------|--------------------|---------------------|-----------------------|--------------------------|-------------|---------------------|
| QG        | 46                   | 2.30 ± 0.30 | 0.03 ± 0.02         | 0.21 ± 0.03 | 10.89 ± 1.14       | 0.49 ± 0.06         | 3.52 ± 0.44           | 0.12 ± 0.01              | 0.35 ± 0.03 | 0.03 ± 0.03         |
|           | 47                   | 1.92 ± 0.07 | 0.05 ± 0.00         | 0.30 ± 0.08 | 11.83 ± 1.39       | 0.58 ± 0.07         | 3.40 ± 0.36           | 0.12 ± 0.03              | 0.17 ± 0.04 | 0.03 ± 0.02         |
|           | 48                   | 2.34 ± 0.23 | 0.04 ± 0.01         | 0.30 ± 0.03 | 14.96 ± 1.25       | 0.58 ± 0.06         | 3.55 ± 0.39           | 0.14 ± 0.01              | 0.23 ± 0.02 | 0.05 ± 0.01         |
|           | 49                   | 3.44 ± 0.36 | 0.06 ± 0.00         | 0.48 ± 0.15 | 20.69 ± 1.32       | 0.85 ± 0.07         | 5.11 ± 0.38           | 0.23 ± 0.01              | 0.26 ± 0.02 | 0.03 ± 0.03         |
|           | 50                   | 3.17 ± 0.50 | 0.01 ± 0.02         | 0.72 ± 0.11 | 24.90 ± 3.91       | 0.55 ± 0.07         | 3.98 ± 0.61           | 0.16 ± 0.02              | 0.16 ± 0.02 | 0.07 ± 0.01         |
|           | 51                   | 4.01 ± 0.65 | 0.04 ± 0.01         | 0.47 ± 0.06 | 34.25 ± 4.65       | 0.56 ± 0.36         | 4.42 ± 0.55           | 0.26 ± 0.03              | 0.19 ± 0.02 | 0.09 ± 0.01         |
|           | 52                   | 4.09 ± 0.20 | 0.04 ± 0.00         | 1.40 ± 0.08 | 40.08 ± 1.98       | 0.06 ± 0.05         | 3.71 ± 0.17           | 0.22 ± 0.02              | 0.15 ± 0.02 | 0.10 ± 0.00         |
|           | 53                   | 5.00 ± 0.73 | 0.06 ± 0.01         | 1.31 ± 0.36 | 46.64 ± 9.66       | 0.36 ± 0.52         | 4.29 ± 0.43           | 0.27 ± 0.09              | 0.19 ± 0.05 | 0.09 ± 0.03         |
|           | 54                   | 3.82 ± 0.53 | 0.04 ± 0.00         | 1.09 ± 0.12 | 34.32 ± 3.80       | 0.08 ± 0.07         | 3.78 ± 0.81           | 0.22 ± 0.02              | 0.16 ± 0.02 | 0.06 ± 0.02         |
| HG        | 46                   | 2.05 ± 0.46 | 0.01 ± 0.02         | 0.30 ± 0.13 | 11.56 ± 1.90       | 0.51 ± 0.08         | 3.55 ± 0.65           | 0.12 ± 0.02              | 0.30 ± 0.05 | 0.03 ± 0.03         |
|           | 47                   | 4.17 ± 0.38 | 0.06 ± 0.01         | 0.48 ± 0.04 | 24.99 ± 2.26       | 0.81 ± 0.08         | 4.35 ± 0.43           | 0.19 ± 0.02              | 0.23 ± 0.02 | 0.07 ± 0.00         |
|           | 48                   | 3.12 ± 0.42 | 0.05 ± 0.01         | 0.59 ± 0.07 | 26.19 ± 3.18       | 0.67 ± 0.08         | 3.10 ± 0.39           | 0.18 ± 0.02              | 0.00 ± 0.00 | 0.06 ± 0.01         |
|           | 49                   | 3.82 ± 0.66 | 0.06 ± 0.01         | 0.53 ± 0.09 | 26.32 ± 4.31       | 0.78 ± 0.12         | 4.25 ± 0.79           | 0.18 ± 0.03              | 0.21 ± 0.03 | 0.06 ± 0.00         |
|           | 50                   | 3.94 ± 1.75 | 0.06 ± 0.03         | 0.43 ± 0.19 | 22.40 ± 9.93       | 0.92 ± 0.42         | 6.71 ± 2.90           | 0.24 ± 0.11              | 0.32 ± 0.15 | 0.04 ± 0.04         |
|           | 51                   | 3.40 ± 0.22 | 0.05 ± 0.01         | 0.59 ± 0.04 | 23.58 ± 1.25       | 0.71 ± 0.06         | 5.78 ± 0.51           | 0.18 ± 0.01              | 0.25 ± 0.02 | 0.05 ± 0.01         |
|           | 52                   | 3.86 ± 0.33 | 0.00 ± 0.00         | 0.94 ± 0.07 | 29.23 ± 2.27       | 0.51 ± 0.32         | 3.94 ± 0.35           | 0.19 ± 0.02              | 0.18 ± 0.03 | 0.07 ± 0.01         |
|           | 53                   | 3.50 ± 0.30 | 0.00 ± 0.00         | 1.18 ± 0.11 | 32.77 ± 3.69       | 0.50 ± 0.32         | 4.21 ± 0.33           | 0.24 ± 0.02              | 0.19 ± 0.01 | 0.06 ± 0.01         |
|           | 54                   | 3.20 ± 0.76 | 0.04 ± 0.00         | 1.23 ± 0.16 | 35.06 ± 4.93       | 0.07 ± 0.06         | 3.53 ± 0.49           | 0.23 ± 0.03              | 0.23 ± 0.03 | 0.07 ± 0.01         |
| M43       | 46                   | 3.54 ± 0.02 | 0.06 ± 0.00         | 0.40 ± 0.01 | 23.81 ± 0.14       | 0.89 ± 0.01         | 5.25 ± 0.07           | 0.17 ± 0.00              | 0.24 ± 0.01 | 0.07 ± 0.00         |
|           | 47                   | 3.83 ± 0.26 | 0.04 ± 0.00         | 0.34 ± 0.03 | 19.68 ± 1.34       | 0.70 ± 0.04         | 3.86 ± 0.28           | 0.19 ± 0.01              | 0.39 ± 0.04 | 0.06 ± 0.01         |
|           | 48                   | 4.02 ± 0.62 | 0.06 ± 0.00         | 0.31 ± 0.10 | 24.83 ± 7.36       | 0.91 ± 0.09         | 5.11 ± 0.53           | 0.20 ± 0.05              | 0.32 ± 0.01 | 0.07 ± 0.01         |
|           | 49                   | 4.08 ± 0.25 | 0.05 ± 0.00         | 0.38 ± 0.02 | 28.79 ± 1.78       | 0.87 ± 0.05         | 4.85 ± 0.32           | 0.23 ± 0.01              | 0.27 ± 0.01 | 0.07 ± 0.00         |

|  |    |             |             |             |               |             |             |             |             |             |
|--|----|-------------|-------------|-------------|---------------|-------------|-------------|-------------|-------------|-------------|
|  | 50 | 3.27 ± 0.21 | 0.01 ± 0.02 | 0.38 ± 0.03 | 25.43 ± 1.54  | 0.64 ± 0.02 | 3.66 ± 0.18 | 0.22 ± 0.01 | 0.23 ± 0.01 | 0.07 ± 0.02 |
|  | 51 | 4.58 ± 1.78 | 0.03 ± 0.03 | 0.69 ± 0.43 | 35.79 ± 10.94 | 0.89 ± 0.28 | 5.21 ± 1.60 | 0.27 ± 0.07 | 0.22 ± 0.05 | 0.06 ± 0.01 |
|  | 52 | 5.51 ± 2.28 | 0.00 ± 0.00 | 0.83 ± 0.29 | 48.00 ± 20.98 | 0.34 ± 0.27 | 6.01 ± 2.67 | 0.39 ± 0.17 | 0.29 ± 0.13 | 0.07 ± 0.07 |
|  | 53 | 3.96 ± 1.64 | 0.04 ± 0.03 | 0.66 ± 0.31 | 37.92 ± 18.22 | 0.18 ± 0.21 | 2.95 ± 1.41 | 0.19 ± 0.09 | 0.13 ± 0.07 | 0.08 ± 0.04 |
|  | 54 | 3.59 ± 0.59 | 0.00 ± 0.00 | 0.67 ± 0.21 | 35.18 ± 10.53 | 0.02 ± 0.03 | 3.14 ± 0.86 | 0.25 ± 0.07 | 0.13 ± 0.03 | 0.06 ± 0.01 |

QG, *C. meiocarpa* var *Qingguo*; HG, *C. meiocarpa* var *Hongguo*; M43, *C. oleifera* cv *Min 43*. Data were expressed as mean ± SD (n = 3).
