# Supplementary material for: Integrative Metabolic and Transcriptomic Profiling in Camellia oleifera and Camellia meiocarpa Uncover Potential Mechanisms That Govern Triacylglycerol Degradation during Seed Desiccation
Source: MDPI journal article supplement (doi:10.3390/plants12142591), 2023-07-08
Supplement: s1 [file s1]

**Supplementary Table S11.** Selected genes and their primer sequences for qRT-PCR analysis

|             | Gene ID in HG                           | Gene ID in Min 43                       | Forward primer                       | Reverse primer                       |
|-------------|-----------------------------------------|-----------------------------------------|--------------------------------------|--------------------------------------|
| Con<br>trol | GAPDH<br>TRINITY_DN2580<br>6_c1_g3_i1_1 | GAPDH<br>TRINITY_DN3591<br>8_c1_g1_i1_2 | 5'-<br>GGTTTGGCATTGT<br>TGAGGGT-3'   | 5'-<br>CCTCTCCAGTCC<br>TTGCTTGA-3'   |
| 1           | TRINITY_DN2039<br>4_c0_g1_i1_2          | TRINITY_DN2458<br>7_c0_g1_i1_1          | 5'-<br>GGCAAGACTTGT<br>CCGAGGGA-3'   | ACTCGCAGCATC<br>GGTTGTCA-3'          |
| 2           | TRINITY_DN2552<br>2_c0_g1_i1_1          | TRINITY_DN3237<br>0_c0_g1_i4_2          | 5'-<br>TTCAAGCCTCCTC<br>GATGCCA-3'   | 5'-<br>TTGGTGGGTCTC<br>ATGGCAGA-3'   |
| 3           | TRINITY_DN2150<br>1_c0_g1_i1_1          | TRINITY_DN2619<br>0_c1_g1_i1_1          | 5'-<br>ACCCGATGCACC<br>CGAAATCA-3'   | 5'-<br>CCGTTGAGCCTC<br>GTTCTCCA-3'   |
| 4           | TRINITY_DN2318<br>8_c1_g1_i1_1          | TRINITY_DN2434<br>3_c0_g2_i3_1          | 5'-<br>AGGATGCCACGT<br>AGCTCTGG-3'   | 5'-<br>TGAAGGCGTCGA<br>AGGTGAGG-3'   |
| 5           | TRINITY_DN2972<br>9_c0_g2_i1_1          | TRINITY_DN2346<br>6_c2_g1_i2_2          | 5'-<br>ACTTCTGCCATGA<br>TCGTCCCA-3'  | 5'-<br>CCTCGATCTGAC<br>ATCTGCACG-3'  |
| 6           | TRINITY_DN2889<br>4_c0_g2_i1_1          | TRINITY_DN3539<br>9_c0_g3_i1_2          | 5'-<br>TCATGAGACTCAA<br>GCAAACGCA-3' | 5'-<br>AGTGCTGGAGGG<br>ATTGTCTGT-3'  |
| 7           | TRINITY_DN1741<br>3_c0_g1_i1_2          | TRINITY_DN3034<br>1_c0_g1_i3_1          | 5'-<br>GCATCCCCCATCA<br>GTAAG-3'     | 5'-<br>TTGCTCCCCAGA<br>TTCC-3'       |
| 8           | TRINITY_DN4285<br>_c0_g1_i1_2           | TRINITY_DN2163<br>3_c0_g1_i1_1          | 5'-<br>CCAGCACATGAG<br>GAGGCGAT-3'   | 5'-<br>GCCTCTCCTCTC<br>TCCTCATCGT-3' |
